# Supplementary material
Source: publisher figshare collection journal article supplement (https://frontiersin.figshare.com/ndownloader/files/27894288)
Supplement: Supplementary file 1 [file 27894288]

## Appendix

The 56 core sentence pairs. Compound targets (2<sup>nd</sup> word of 2<sup>nd</sup> sentence) we either semantically transparent-transparent (TT), opaque-transparent (OT), or transparent-opaque(TO). The three alternative endings to the first sentence of each pair are shown in the following order of their relation to the target compound: (neutral/semantic/lexical)

1. TT1: He always sent the funniest surprises/parcels/mail. The mailbox was full again today.
2. TT1: He put together the baby's toy/crib/bed. The bedroom was almost ready now.
3. TT1: He regretted moving to this town/campus/school. The schoolyard was full of strangers.
4. TT1: He stepped in the filthy area/tub/shower. The showerhead was covered in grime.
5. TT1: He tried to hide his face/anguish/tear. The teardrop ran down his cheek.
6. TT1: She cried looking at her picture/wig/hair. The hairbrush had belonged to Grandma.
7. TT1: She felt pain in her body/chest/heart. Her heartbeat was growing very faint.
8. TT1: She hated playing in the woods/winter/snow. The snowball exploded in her face.
9. TT1: She walked down to the path/river/water. The waterfall roared in the distance.
10. TT1: She was abandoned in the field/storm/rain. The raincoat was all she had.
11. TT1: She wrote down another little idea/memo/note. The notebook held all her secrets.
12. TT1: They gazed up at the trees/stars/moon. The moonlight glowed on the water.
13. TT1: They needed to redo the kitchen/decor/wall. The wallpaper was mostly peeled off.
14. TT2: He could feel the warm breeze/glow/light. The daylight poured into the room.
15. TT2: He decided he liked the look/piercing/ring. The nosering would make her mad.
16. TT2: He didn't regret destroying the work/volume/book. The textbook was full of lies.
17. TT2: He drove along the winding river/track/road. The railroad went on for miles.
18. TT2: He had never enjoyed his life/job/work. The housework was a welcome distraction.
19. TT2: He hated being in that position/seat/chair. The wheelchair made him feel trapped.
20. TT2: He listened quietly to the trees/lark/bird. The songbird sang in the distance.
21. TT2: He needed to get more warmth/timber/wood. The firewood was quickly running out.
22. TT2: He never saw the red object/blade/knife. The pocketknife stabbed into his back.
23. TT2: He waved goodbye to the group/raft/boat. The lifeboat faded into the distance.
24. TT2: She envied her friend's new style/purse/bag. The handbag was beyond her budget.
25. TT2: She needed to replace the unit/buzzer/bell. The doorbell would not stop ringing.
26. TT2: She was confused by the name/stamp/card. The postcard was from her husband.
27. TT2: The flames spread to the north/barn/house. The farmhouse burnt to the ground.
28. TT2: They decided to replace the set/china/cup. The teacup held too many memories.
29. OT: He called everyday about the road/crack/hole. The pothole still hadn't been fixed.
30. OT: He could risk stealing the food/snack/fruit. The grapefruit did smell so good.
31. OT: He needed to catch the animal/bunny/rabbit. The jackrabbit heard him coming close.
32. OT: He needed to remember the idea/term/word. The keyword was his only hope.
33. OT: He tried to bend the object/rod/bar. The crowbar folded in half easily.
34. OT: She dropped the very last plate/fruit/melon. The watermelon fell onto the floor.
35. OT: She gently touched the last dessert/tart/berry. The strawberry looked like a heart.
36. OT: She had always wanted a friend/pet/dog. The bulldog snuggled up beside her.
37. OT: She knew all about the book/story/tale. The fairytale was coming true now.
38. OT: She looked closely at the grass/insect/bug. The ladybug landed on her finger.
39. OT: She looked out at the yard/garden/flower. The sunflower had almost withered away.
40. OT: She really craved the spicy taste/sauce/radish. The horseradish made her eyes water.
41. OT: She was ready for the camera/show/walk. The catwalk was her second home.
42. OT: They looked down at the water/catch/fish. The sunfish thrashed on the hook.

43. TO: He closely inspected the man's injury/leg/knee. The kneecap was luckily not fractured.
44. TO: He couldn't find the missing line/entry/data. The database was slowly being deleted.
45. TO: He decided to reveal his plan/ace/card. The cardshark played a fine game.
46. TO: He grew tired of the wait/weather/heat. The heatwave went on for years.
47. TO: He never returned to the building/prison/jail. The jailbird thought he was free.
48. TO: He slowly lifted up his hand/weapon/gun. The gunfire echoed in the night.
49. TO: He was waiting for the update/report/news. The newscast did not mention him.
50. TO: She had nearly finished the series/novel/book. The bookworm stayed up all night.
51. TO: She took time preparing the treat/dessert/dough. The doughnut was for her sister.
52. TO: She tossed away her last possession/boot/shoe. The shoehorn was useless to her.
53. TO: She tried to fix the problem/computer/key. The keyboard still did not work.
54. TO: She tripped on the broken board/step/stair. The staircase collapsed as she fell.
55. TO: They loved driving in the evening/region/country. The countryside was calm and quiet.
56. TO: They poked cautiously at the robot/face/eye. The eyeball was way too realistic.
